# Supplementary material for: Variability on microevolutionary and macroevolutionary scales: a review on patterns of morphological variation in Cnidaria Medusozoa
Source: Springer Nature journal article supplement (doi:10.1007/s13127-016-0276-4), 2016-04-04
Supplement: 13127_2016_276_MOESM1_ESM.pdf [file 13127_2016_276_MOESM1_ESM.pdf]

Variability on microevolutionary and macroevolutionary scales: a review on patterns of morphological variation in Cnidaria Medusozoa

Organisms Diversity and Evolution

Amanda F. Cunha<sup>1</sup>, Maximiliano M. Maronna and Antonio C. Marques

<sup>1</sup>Corresponding author, Departamento de Zoologia, Instituto de Biociências, Universidade de São Paulo, São Paulo, Brazil. E-mail: amanfcunha@gmail.com

Online Resource 1. Specimens of *Orthopyxis sargassicola* (Nutting, 1905) measured in this study, and their respective morphometric data (in  $\mu\text{m}$ ). Intracolony variation was evaluated for these (\*) specimens. MZUSP=Museu de Zoologia da Universidade de São Paulo.

| Specimen       | Locality                    | Geographical Coordinates   | Total Length of the Trophosome | Length of Pedicel | Length of Hydrotheca | Diameter of Hydrotheca at Margin | Maximum Thickness of the Hydrotheca at Medial Portion | Maximum Thickness of the Pedicel at Medial Portion | Maximum Number of Sinuosities in the Pedicel | Number of Hydrothecal Cusps |
|----------------|-----------------------------|----------------------------|--------------------------------|-------------------|----------------------|----------------------------------|-------------------------------------------------------|----------------------------------------------------|----------------------------------------------|-----------------------------|
| MZUSP4079<br>* | Bombas, Bombinhas, Brazil   | 27°07.874'S<br>48°30.817'W | 1040                           | 710               | 365                  | 290                              | 27.5                                                  | 15                                                 | 12                                           | 11                          |
|                |                             |                            | 1100                           | 640               | 430                  | 330                              | 20                                                    | 22.5                                               | 8                                            | 11                          |
|                |                             |                            | 1240                           | 780               | 420                  | 265                              | 17.5                                                  | 6.25                                               | 12                                           | 10                          |
|                |                             |                            | 1120                           | 800               | 340                  | 285                              | 22.5                                                  | 27.5                                               | 9                                            | 11                          |
|                |                             |                            | 1120                           | 680               | 325                  | 265                              | 22.5                                                  | 17.5                                               | 8                                            | 11                          |
| MZUSP4161<br>* | Trapiche, Bombinhas, Brazil | 27°08.795'S<br>48°28.871'W | 2060                           | 1500              | 560                  | 385                              | 17.5                                                  | 22.5                                               | 17                                           | 12                          |
|                |                             |                            | 2380                           | 1610              | 620                  | 420                              | 13.75                                                 | 12.5                                               | 17                                           | 13                          |
|                |                             |                            | 2240                           | 1680              | 540                  | 425                              | 20                                                    | 15                                                 | 18                                           | 10                          |
|                |                             |                            | 1740                           | 1090              | 560                  | 375                              | 10                                                    | 7.5                                                | 16                                           | 10                          |

| Specimen  | Locality                     | Geographical Coordinates     | Total Length of the Trophosome | Length of Pedicel | Length of Hydrotheca | Diameter of Hydrotheca at Margin | Maximum Perisarc Thickness of the Hydrotheca at Medial Portion | Maximum Perisarc Thickness of the Pedicel at Medial Portion | Maximum Number of Sinuosities in the Pedicel | Number of Hydrothecal Cusps |
|-----------|------------------------------|------------------------------|--------------------------------|-------------------|----------------------|----------------------------------|----------------------------------------------------------------|-------------------------------------------------------------|----------------------------------------------|-----------------------------|
|           |                              |                              | 2160                           | 1320              | 590                  | 355                              | 7.5                                                            | 10                                                          | 23                                           | 12                          |
| MZUSP4597 | Campeche Island,             | 27°41'27"S                   | 1460                           | 900               | 540                  | 320                              | 7.5                                                            | 12.5                                                        | 14                                           | 11                          |
| MZUSP4665 | Florianópolis, Brazil        | 48°27'51"W                   | 2180                           | 1600              | 550                  | 290                              | 5                                                              | 7.5                                                         | 3                                            | 11                          |
| MZUSP2605 | Paraty, Brazil               | Specific coordinates unknown | 2220                           | 1400              | 530                  | 275                              | 3.75                                                           | 7.5                                                         | 20                                           | 11                          |
| MZUSP2606 |                              |                              | 1620                           | 1120              | 470                  | 235                              | 2.5                                                            | 6.25                                                        | 4                                            | 10                          |
| MZUSP2607 |                              |                              | 1640                           | 1110              | 500                  | 260                              | 2.5                                                            | 7.5                                                         | 5                                            | 11                          |
| MZUSP2608 |                              |                              | 2360                           | 1690              | 575                  | 260                              | 2.5                                                            | 5                                                           | 3                                            | 11                          |
| MZUSP2609 |                              |                              | 2080                           | 1520              | 520                  | 315                              | 37.5                                                           | 8.75                                                        | 10                                           | 14                          |
| MZUSP2610 | Ratos Island, Paraty, Brazil | 23°11.640'S<br>44°36.408'W   | 1860                           | 1050              | 570                  | 270                              | 7.5                                                            | 12.5                                                        | 11                                           | 11                          |
| MZUSP2611 | Meros Island, Paraty, Brazil | 23°11.264'S<br>44°34.635'W   | 1720                           | 1200              | 480                  | 270                              | 3.75                                                           | 7.5                                                         | 13                                           | 11                          |
| MZUSP2617 | Padres, Aracruz, Brazil      | 19°55.941'S<br>40°07.327'W   | 2280                           | 1300              | 590                  | 300                              | 11.25                                                          | 12.5                                                        | 19                                           | 10                          |
| MZUSP2618 |                              |                              | 2100                           | 1560              | 530                  | 325                              | 2.5                                                            | 10                                                          | 21                                           | 10                          |
| MZUSP2619 |                              |                              | 1720                           | 1250              | 440                  | 375                              | 50                                                             | 22.5                                                        | 14                                           | 11                          |
| MZUSP2620 |                              |                              | 1680                           | 1110              | 480                  | 355                              | 70                                                             | 17.5                                                        | 17                                           | 10                          |
| MZUSP2624 |                              |                              | 2640                           | 2110              | 550                  | 375                              | 32.5                                                           | 15                                                          | 21                                           | 12                          |
| MZUSP2627 |                              |                              | 1780                           | 1300              | 430                  | 300                              | 30                                                             | 10                                                          | 20                                           | 11                          |
| MZUSP2628 |                              |                              | 1720                           | 1260              | 460                  | 315                              | 27.5                                                           | 22.5                                                        | 19                                           | 11                          |
| MZUSP2632 |                              |                              | 1980                           | 1390              | 540                  | 345                              | 37.5                                                           | 15                                                          | 22                                           | 11                          |
| MZUSP2629 | Formosa, Aracruz, Brazil     | Specific coordinates unknown | 1640                           | 1180              | 430                  | 290                              | 22.5                                                           | 12.5                                                        | 19                                           | 10                          |
| MZUSP2630 |                              |                              | 1580                           | 1180              | 450                  | 315                              | 27.5                                                           | 12.5                                                        | 17                                           | 12                          |
| MZUSP2594 | Lázaro, Ubatuba,             | 23°30'32.64"S                | 1160                           | 630               | 460                  | 310                              | 32.5                                                           | 5                                                           | 9                                            | 11                          |

| <b>Specimen</b> | <b>Locality</b>                          | <b>Geographical Coordinates</b> | <b>Total Length of the Trophosome</b> | <b>Length of Pedicel</b> | <b>Length of Hydrotheca</b> | <b>Diameter of Hydrotheca at Margin</b> | <b>Maximum Perisarc Thickness of the Hydrotheca at Medial Portion</b> | <b>Maximum Perisarc Thickness of the Pedicel at Medial Portion</b> | <b>Maximum Number of Sinuosities in the Pedicel</b> | <b>Number of Hydrothecal Cusps</b> |
|-----------------|------------------------------------------|---------------------------------|---------------------------------------|--------------------------|-----------------------------|-----------------------------------------|-----------------------------------------------------------------------|--------------------------------------------------------------------|-----------------------------------------------------|------------------------------------|
| MZUSP2595       | Brazil                                   | 45°08'18.52"W                   | 1760                                  | 1300                     | 450                         | 340                                     | 10                                                                    | 12.5                                                               | 17                                                  | 11                                 |
| MZUSP2596       |                                          |                                 | 1680                                  | 1220                     | 470                         | 315                                     | 42.5                                                                  | 15                                                                 | 17                                                  | 10                                 |
| MZUSP2597       |                                          |                                 | 1200                                  | 810                      | 380                         | 255                                     | 40                                                                    | 15                                                                 | 16                                                  | 10                                 |
| MZUSP2599       |                                          |                                 | 1520                                  | 1040                     | 500                         | 335                                     | 15                                                                    | 12.5                                                               | 17                                                  | 13                                 |
| MZUSP2600       |                                          |                                 | 1500                                  | 1060                     | 640                         | 285                                     | 27.5                                                                  | 12.5                                                               | 16                                                  | 10                                 |
| MZUSP2602       |                                          |                                 | 1460                                  | 950                      | 460                         | 350                                     | 32.5                                                                  | 20                                                                 | 13                                                  | 12                                 |
| MZUSP2603       |                                          |                                 | 1840                                  | 1340                     | 460                         | 320                                     | 15                                                                    | 15                                                                 | 18                                                  | 12                                 |
| MZUSP2593       | Preta, São Sebastião, Brazil             | Specific coordinates unknown    | 1600                                  | 1090                     | 450                         | 305                                     | 27.5                                                                  | 10                                                                 | 18                                                  | 12                                 |
| MZUSP1319       | Massaguaçu Island, Caraguatatuba, Brazil | 23°25'S 44°49'W                 | 1660                                  | 1150                     | 490                         | 350                                     | 25                                                                    | 22.5                                                               | 13                                                  | 12                                 |
| MZUSP0256       | Ilhabela, São Paulo, Brazil              | 23°44.800'S<br>45°20.948'W      | 1560                                  | 1000                     | 560                         | 285                                     | 2.5                                                                   | 10                                                                 | 16                                                  | 11                                 |
| MZUSP0183       | Barequeçaba, São Sebastião, Brazil       | 23°49.888'S<br>45°25.915'W      | 2260                                  | 840                      | 450                         | 345                                     | 32.5                                                                  | 17.5                                                               | 25                                                  | 13                                 |
