# Supplementary material for: Variability on microevolutionary and macroevolutionary scales: a review on patterns of morphological variation in Cnidaria Medusozoa
Source: Springer Nature journal article supplement (doi:10.1007/s13127-016-0276-4), 2016-04-04
Supplement: 13127_2016_276_MOESM2_ESM.pdf [file 13127_2016_276_MOESM2_ESM.pdf]

## Variability on microevolutionary and macroevolutionary scales: a review on patterns of morphological variation in Cnidaria Medusozoa

### Organisms Diversity and Evolution

Amanda F. Cunha<sup>1</sup>, Maximiliano M. Maronna and Antonio C. Marques

<sup>1</sup>Corresponding author, Departamento de Zoologia, Instituto de Biociências, Universidade de São Paulo, São Paulo, Brazil. E-mail: amanfcunha@gmail.com

Online Resource 2. GenBank data (up to January 2013) for estimation of Hydrozoa cryptic diversity (Fig. 3). Names of species are in accordance with the original information provided for the sequences in GenBank, although we are aware that misidentifications may occur. When no geographical coordinate was provided with the species record, the coordinates were estimated based on the name of the sampling location, in order to calculate the geographical distance. Species were classified in accordance with their life cycle strategy (holoplanktonic/pleustonic or meroplanktonic/benthic) based on information from the literature.

| COI Sequences (GenBank accession numbers) | Species                    | Number of Haplotypes | Number of geographical locations | Similarity (%) | Distance (Km) | Life Cycle     |
|-------------------------------------------|----------------------------|----------------------|----------------------------------|----------------|---------------|----------------|
| GQ119939, HM053518                        | <i>Abylopsis tetragona</i> | 2                    | 2                                | 99.1           | 14115         | Holoplanktonic |
| JQ716190-93, JQ716195-97                  | <i>Aequorea australis</i>  | 7                    | 1                                | 97.3           | 0             | Meroplanktonic |
| JQ716175-77                               | <i>Aequorea conica</i>     | 3                    | 1                                | 98.8           | 0             | Meroplanktonic |
| JQ716056, JQ716185, JQ716181-82, JQ716184 | <i>Aequorea papillata</i>  | 5                    | 1                                | 99.0           | 0             | Meroplanktonic |
| GQ119940-43, AY937363                     | <i>Agalma elegans</i>      | 5 <sup>a</sup>       | 2                                | 98.0           | 1900          | Holoplanktonic |
| GQ119944-45, GQ119947-48                  | <i>Agalma okeni</i>        | 4 <sup>a</sup>       | 1                                | 99.1           | 637           | Holoplanktonic |
| FJ602534-35, GQ120073                     | <i>Aglantha digitale</i>   | 3                    | 3                                | 95.5           | 3257          | Holoplanktonic |

| COI Sequences (GenBank accession numbers)    | Species                            | Number of Haplotypes | Number of geographical locations | Similarity (%) | Distance (Km) | Life Cycle     |
|----------------------------------------------|------------------------------------|----------------------|----------------------------------|----------------|---------------|----------------|
| JQ716057, JQ716085                           | <i>Amphinema dinema</i>            | 2 <sup>a</sup>       | 1                                | 99.8           | 0             | Meroplanktonic |
| GQ119956, AY937364                           | <i>Athorybia rosacea</i>           | 2                    | 1                                | 99.3           | 1796          | Holoplanktonic |
| GQ119959-60                                  | <i>Bassia bassensis</i>            | 2                    | 1                                | 99.5           | 706           | Holoplanktonic |
| JQ716117-19                                  | <i>Blackfordia polytentaculata</i> | 3 <sup>a</sup>       | 1                                | 99.4           | 0             | Meroplanktonic |
| JQ716112-13, JQ716115-16                     | <i>Blackfordia virginica</i>       | 4 <sup>a</sup>       | 1                                | 99.4           | 0             | Meroplanktonic |
| JX121578, GU812438                           | <i>Candelabrum cocksii</i>         | 2 <sup>b</sup>       | 1                                | 100.0          | 0             | Benthic        |
| AY789898-99, AY789901, DQ068054-56           | <i>Clytia gracilis</i>             | 6                    | 4                                | 82.4           | 5697          | Meroplanktonic |
| AY789902, HM053515, HM053517                 | <i>Clytia hemisphaerica</i>        | 3                    | 1                                | 91.4           | 9391          | Meroplanktonic |
| AY789894-95                                  | <i>Clytia hummelincki</i>          | 2                    | 2                                | 99.4           | 8248          | Meroplanktonic |
| JQ716206-09                                  | <i>Clytia</i> sp. KC JRH-2012      | 4 <sup>b</sup>       | 1                                | 100.0          | 0             | Meroplanktonic |
| JQ716198-6205                                | <i>Clytia</i> sp. n. JRH-2012      | 7 <sup>b</sup>       | 1                                | 99.0           | 0             | Meroplanktonic |
| GQ120076-77                                  | <i>Colobonema sericeum</i>         | 2                    | 1                                | 99.2           | 2038          | Holoplanktonic |
| JQ716061-64                                  | <i>Corymorpha verrucosa</i>        | 4 <sup>b</sup>       | 1                                | 99.5           | 0             | Meroplanktonic |
| GQ119967-70                                  | <i>Diphyes bojani</i>              | 4                    | 1                                | 98.7           | 0             | Holoplanktonic |
| GQ119971, GQ119973, AY937367                 | <i>Diphyes dispar</i>              | 3                    | 2                                | 99.1           | 3165          | Holoplanktonic |
| JQ716152-55                                  | <i>Eirene brevistylus</i>          | 4 <sup>b</sup>       | 1                                | 99.2           | 0             | Meroplanktonic |
| FJ418658, HM053525-27, JQ716138, JQ716140-42 | <i>Eirene ceylonensis</i>          | 8 <sup>b</sup>       | 1                                | 91.1           | 0             | Meroplanktonic |
| JQ716148-51, FJ418659                        | <i>Eirene hexanemalis</i>          | 5 <sup>b</sup>       | 1                                | 97.9           | 0             | Meroplanktonic |
| JQ716128-29, JQ716131, FJ418660              | <i>Eirene kambara</i>              | 4 <sup>b</sup>       | 1                                | 99.2           | 0             | Meroplanktonic |
| JQ716132, JQ716134, JQ716135-36, FJ418662    | <i>Eirene menoni</i>               | 5 <sup>b</sup>       | 1                                | 99.7           | 0             | Meroplanktonic |
| FJ418656, JQ716144-46                        | <i>Eirene pyramidalis</i>          | 4 <sup>b</sup>       | 1                                | 99.8           | 0             | Meroplanktonic |
| GQ119977-80                                  | <i>Eudoxoides mitra</i>            | 4                    | 1                                | 98.7           | 405           | Holoplanktonic |
| GQ119981-83                                  | <i>Eudoxoides spiralis</i>         | 3                    | 1                                | 99.3           | 962           | Holoplanktonic |

| COI Sequences (GenBank accession numbers)                             | Species                        | Number of Haplotypes | Number of geographical locations | Similarity (%) | Distance (Km) | Life Cycle     |
|-----------------------------------------------------------------------|--------------------------------|----------------------|----------------------------------|----------------|---------------|----------------|
| JQ716171-72, JQ716174, FJ418666                                       | <i>Eugymnanthea japonica</i>   | 4 <sup>b</sup>       | 1                                | 99.5           | 0             | Meroplanktonic |
| FJ602537-39                                                           | <i>Euphysa flammea</i>         | 3                    | 1                                | 99.0           | 1011          | Holoplanktonic |
| AB458447-61, AB458463-68,<br>AB458470, AB458473-92, AB458494-<br>8502 | <i>Eutima japonica</i>         | 49                   | 1                                | 96.9           | 0             | Meroplanktonic |
| JQ716158-60, FJ418664                                                 | <i>Eutima krampi</i>           | 4 <sup>b</sup>       | 1                                | 99.0           | 0             | Meroplanktonic |
| FJ418663, JQ716156-57                                                 | <i>Eutima levuka</i>           | 3 <sup>b</sup>       | 1                                | 99.4           | 0             | Meroplanktonic |
| GQ119990, GQ119992, GQ120047                                          | <i>Halistemma amphytroidis</i> | 3 <sup>a</sup>       | 1                                | 99.7           | 2649          | Holoplanktonic |
| JQ716163-65, FJ418667                                                 | <i>Helgicirrha brevistyla</i>  | 4 <sup>b</sup>       | 1                                | 99.0           | 0             | Meroplanktonic |
| JQ716161-62, FJ418665                                                 | <i>Helgicirrha malayensis</i>  | 3 <sup>b</sup>       | 1                                | 99.5           | 0             | Meroplanktonic |
| GQ119993-98, HM053521                                                 | <i>Hippopodius hippopus</i>    | 7                    | 2                                | 93.3           | 6405          | Holoplanktonic |
| JQ716120-21                                                           | <i>Laodicea undulata</i>       | 2 <sup>b</sup>       | 1                                | 99.4           | 0             | Meroplanktonic |
| AY789910-12                                                           | <i>Laomedea flexuosa</i>       | 3                    | 1                                | 98.3           | 1545          | Benthic        |
| GQ120001, GQ120066                                                    | <i>Lensia campanella</i>       | 2                    | 1                                | 97.1           | 0             | Holoplanktonic |
| GQ120004-07                                                           | <i>Lensia fowleri</i>          | 4                    | 1                                | 99.3           | 52            | Holoplanktonic |
| GQ120016-17                                                           | <i>Lilyopsis rosea</i>         | 2                    | 1                                | 99.8           | 0             | Holoplanktonic |
| JQ716065, JQ716067                                                    | <i>Liriope tetraphylla</i>     | 2 <sup>b</sup>       | 1                                | 100.0          | 0             | Holoplanktonic |
| JQ716109-11                                                           | <i>Malagazzia carolinae</i>    | 3 <sup>b</sup>       | 1                                | 99.7           | 0             | Meroplanktonic |
| AY937373, GQ120022, JQ716068-71                                       | <i>Nanomia bijuga</i>          | 6                    | 3                                | 83.1           | 9431          | Holoplanktonic |
| AY789904-05                                                           | <i>Obelia bidentata</i>        | 2                    | 1                                | 87.5           | 6691          | Meroplanktonic |
| AY789906-09                                                           | <i>Obelia longissima</i>       | 4                    | 3                                | 99.3           | 12325         | Meroplanktonic |
| AY789884-87                                                           | <i>Orthopyxis integra</i>      | 4                    | 2                                | 88.3           | 11000         | Meroplanktonic |
| FJ602531-33                                                           | <i>Paragotoea bathybia</i>     | 3                    | 1                                | 99.7           | 0             | Holoplanktonic |
| GQ120032-33, AY937374                                                 | <i>Physalia physalis</i>       | 3                    | 1                                | 99.0           | 1795          | Pleustonic     |
| JQ716077-81                                                           | <i>Proboscoidactyla ornata</i> | 5 <sup>b</sup>       | 1                                | 99.4           | 0             | Meroplanktonic |
| FJ602540-41                                                           | <i>Rathkea octopunctata</i>    | 2                    | 1                                | 100.0          | 0             | Meroplanktonic |

| COI Sequences (GenBank accession numbers) | Species                           | Number of Haplotypes | Number of geographical locations | Similarity (%) | Distance (Km) | Life Cycle     |
|-------------------------------------------|-----------------------------------|----------------------|----------------------------------|----------------|---------------|----------------|
| GQ120038-40                               | <i>Rhizophysa eysenhardti</i>     | 3                    | 1                                | 99.4           | 1675          | Holoplanktonic |
| AY937377, GQ120041                        | <i>Rhizophysa filiformis</i>      | 2                    | 2                                | 92.7           | 1875          | Holoplanktonic |
| GQ120043-45                               | <i>Rosacea</i> sp. 1 BO-2009      | 3                    | 1                                | 92.5           | 1804          | Holoplanktonic |
| HQ603190-97                               | <i>Stylaster californicus</i>     | 8                    | 1                                | 99.1           | 0             | Benthic        |
| HQ718594, HQ718600, JQ716090-6108         | <i>Sugiura chengshanense</i>      | 21 <sup>b</sup>      | 2                                | 99.0           | 0             | Meroplanktonic |
| GQ120048-50, AY937378                     | <i>Sulculeolaria quadrivalvis</i> | 4                    | 1                                | 98.6           | 2169          | Holoplanktonic |
| JQ716123-27                               | <i>Tiaricodon coeruleus</i>       | 5 <sup>b</sup>       | 1                                | 99.0           | 0             | Meroplanktonic |
| JQ716166-70                               | <i>Tima formosa</i>               | 5 <sup>b</sup>       | 1                                | 99.0           | 0             | Meroplanktonic |
| JQ716082-83                               | <i>Turritopsis nutricula</i>      | 3 <sup>b</sup>       | 1                                | 99.7           | 0             | Meroplanktonic |
| HM053528-31, HM053543                     | <i>Varitentacula yantaiensis</i>  | 5 <sup>b</sup>       | 1                                | 99.8           | 0             | Holoplanktonic |

<sup>a</sup> At least one haplotype without specific location.

<sup>b</sup> Haplotypes were assumed to belong to the same location, based on geographical information provided with the metadata for the sequences (“lat\_lon”).
